# Supplementary material for: Coral reef rehabilitation following Hurricane Irma using nano-engineered artificial reefs in Sint Maarten
Source: PeerJ. 2024 Dec 17;12:e18487. doi: 10.7717/peerj.18487 (PMC11660859; doi:10.7717/peerj.18487)
Supplement: Supplemental Information 1 [file peerj-12-18487-s001.xlsx]

## Sheet: Dataframe
Site	Side	Date	Photo	Algal.Matrix	Macroalgae	Coralline.Algae	Biofilm	Anemone	Ascidian	Bivalve	Bryozoan	Hard.Coral	Polychaete	Soft.Coral	Sponge	Fish.Eggs	Other	Obscured	Sediment	Bare	Total.Cover	Total.Points	Notes.Specific Identifications
The.Bridge	H	Jan-30-2020	DSC_2701	25.6098																	25.6098
The.Bridge	H	Jan-30-2020	DSC_2705	19.3182																	19.3182
The.Bridge	V	Jan-30-2020	DSC_2722t	6.76692																	6.76692
The.Bridge	V	Jan-30-2020	DSC_2722b	3.2967																	3.2967
The.Bridge	V	Jan-30-2020																			0
The.Bridge	V	Jan-30-2020																			0
Great.Bay	H	Jan-30-2020	DSC_3038	15.625	25	0	0	0	0	0	0	0	0	0	0	0	0	0			40.625
Great.Bay	H	Jan-30-2020	DSC_3040	15.8879	10.2804	0	0	0	0	0	0	0	0	0	0	0	0	0			26.1682
Great.Bay	H	Jan-30-2020	DSC_3042	10.2041	19.3878	0	0	0	0	0	0	0	0	0	0	0	0	0			29.5918
Great.Bay	V	Jan-30-2020	DSC_3028t	15.4762	5.95238				8						28						57.4286
Great.Bay	V	Jan-30-2020	DSC_3028b	20	1.33333				5				3		13						42.3333
Great.Bay	V	Jan-30-2020
Great Bay	V	Aug-12-2019	P1030395	66.2921	21.3483	0	6.74157	0	0	0	0	0	0	0	0	0	0	0	0	5.61798
Great Bay	V	Aug-12-2019	P1030396	58.6667	36	0	1.33333	0	0	0	0	0	0	0	0	0	0	0	0	4
Great Bay	V	Aug-12-2019	P1030399	96.2963	3.7037	0	0	0	0	0	0	0	0	0	0	0	0	0	0	0
The.Bridge	V	Jan-30-2020	DSC_2735	21	0	13	3	0	2	0	0	0	5	0	64	0	0	0	0	0	108	108
The.Bridge	V	Jan-30-2020	DSC_2743	9	0	6	22	0	0	1	10	0	2	0	124	0	0	0	0	0	174	174
The.Bridge	V	Jan-30-2020	DSC_2731	22	0	14	75	0	2	0	11	0	0	0	75	0	0	0	0	0	199	199
The.Bridge	V	Jan-30-2020	DSC_2730	29	0	4	69	0	0	0	6	0	3	0	29	0	0	0	0	0	140	140
The.Bridge	H	Jan-30-2020	DSC_2701	44	0	0	39	0	7	0	0	0	0	0	18	0	0	0	0	127	235	235
The.Bridge	H	Jan-30-2020	DSC_2705	16	0	6	32	0	0	0	3	0	0	0	19	0	0	37	39	0	152	113
Great.Bay	H	Jan-30-2020	DSC_3038	15	25	0	0	0	0	0	0	0	0	0	0	0	0	0	56	0	96	96
Great.Bay	H	Jan-30-2020	DSC_3040	15.8879	10.2804	0	0	0	0	0	0	0	0	0	0	0	0	0	0	0	26.1682
Great.Bay	H	Jan-30-2020	DSC_3042	10.2041	19.3878	0	0	0	0	0	0	0	0	0	0	0	0	0	0	0	29.5918
Great.Bay	V	Jan-30-2020	DSC_3040	17	11	0	0	0	0	0	0	0	0	0	0	0	0	0	79	0	107	107
Great.Bay	V	Jan-30-2020	DSC_3028t	13	5	0	0	0	8	0	0	0	0	0	28	0	0	0	30	0	84	84
Great.Bay	V	Jan-30-2020	DSC_3028b	15	1	0	0	0	5	0	0	0	3	0	13	0	0	0	38	0	75	75
Great.Bay	V	Jan-30-2020	DSC_3034	37	32	0	20	0	2	0	0	0	0	0	39	0	0	0	0	0	130	130
Mikes.Maze	H	Jan-30-2020	DSC_2919	10	0	17.5	35.8333	0	0	0	0	0	0	0	36.6667	0	0	6	0	0	106	120
Mikes.Maze	H	Jan-30-2020	DSC_2908	21.4286	0	6.12245	35.7143	0	0	0	0	1.02041	0	0	36.7347	0	0	6	0	0	101.02	98
Mikes.Maze	H	Jan-30-2020	DSC_2917	7	0	20	42	0	0	0	2	0	0	0	15	0	0	19	0	0	104	85
Mikes.Maze	V	Jan-30-2020	DSC_2861	8	0	31	17	0	0	0	17	0	0	0	61	0	0	91	0	9	234	143
Mikes.Maze	V	Jan-30-2020	DSC_2868	20	0	26	10	0	1	0	8	0	0	0	28	0	0	48	0	3	144	96
Mikes.Maze	V	Jan-30-2020	DSC_2893	19	7	31	9	0	0	0	4	0	0	0	58	0	0	52	0	0	180	128
Mikes.Maze	V	Jan-30-2020	DSC_2887	11	10	38	9	0	2	0	14	0	3	0	59	0	0	52	0	0	198	146
Mikes.Maze	V	Jan-30-2020	DSC_2884	23	0	34	9	0	1	0	23	0	1	0	84	0	0	93	0	0	268	175
Mikes.Maze	V	Jan-30-2020	DSC_2877	30	3	42	5	0	0	0	15	0	2	0	88	0	0	81	0	0	266	185
Natural.Reefs	H	Jan-29-2020	DSC_2944	39	6	6	16	0	0	0	0	1	0	26	5	0	0	3	0	0	102	123
Natural.Reefs	H	Jan-29-2020	DSC_2950	20	4	20	8	0	0	0	0	10	0	58	13	0	3	5	0	0	141	145
Natural.Reefs	H	Jan-29-2020	DSC_2955	5	2	12	8	0	0	0	0	7	0	74	5	0	2	9	0	0	124	121
Natural.Reefs	H	Jan-29-2020	DSC_2960	2	1	16	8	0	0	0	0	4	0	77	17	0	4	7	0	0	136	133
The.Bridge	V	Jan-30-2020	DSC_2735	19.4444	0	12.037	2.77778	0	1.85185	0	0	0	4.62963	0	59.2593	0	0	0	0	0	100
The.Bridge	V	Jan-30-2020	DSC_2743	5.17241	0	3.44828	12.6437	0	0	0.574713	5.74713	0	1.14943	0	71.2644	0	0	0	0	0	100
The.Bridge	V	Jan-30-2020	DSC_2731	11.0553	0	7.03518	37.6884	0	1.00503	0	5.52764	0	0	0	37.6884	0	0	0	0	0	100
The.Bridge	V	Jan-30-2020	DSC_2730	20.7143	0	2.85714	49.2857	0	0	0	4.28571	0	2.14286	0	20.7143	0	0	0	0	0	100
The.Bridge	H	Jan-30-2020	DSC_2701	18.7234	0	0	16.5957	0	2.97872	0	0	0	0	0	7.65957	0	0	0	0	54.0426	100
The.Bridge	H	Jan-30-2020	DSC_2705	14.1593	0	5.30973	28.3186	0	0	0	2.65487	0	0	0	16.8142	0	0	0	34.5133	0	101.77
Great.Bay	H	Jan-30-2020	DSC_3040	15.8879	10.2804	0	0	0	0	0	0	0	0	0	0	0	0	0			26.1682
Great.Bay	H	Jan-30-2020	DSC_3042	10.2041	19.3878	0	0	0	0	0	0	0	0	0	0	0	0	0			29.5918
Great.Bay	H	Jan-30-2020	DSC_3038	15.625	26.0417	0	0	0	0	0	0	0	0	0	0	0	0	0	58.3333	0	100
Great.Bay	V	Jan-30-2020	DSC_3040	15.8879	10.2804	0	0	0	0	0	0	0	0	0	0	0	0	0	73.8318	0	100
Great.Bay	V	Jan-30-2020	DSC_3028t	15.4762	5.95238	0	0	0	9.52381	0	0	0	0	0	33.3333	0	0	0	35.7143	0	100
Great.Bay	V	Jan-30-2020	DSC_3028b	20	1.33333	0	0	0	6.66667	0	0	0	4	0	17.3333	0	0	0	50.6667	0	100
Great.Bay	V	Jan-30-2020	DSC_3034	28.4615	24.6154	0	15.3846	0	1.53846	0	0	0	0	0	30	0	0	0	0	0	100
Mikes.Maze	H	Jan-30-2020	DSC_2919	10	0	17.5	35.8333	0	0	0	0	0	0	0	36.6667	0	0	6	0	0	100
Mikes.Maze	H	Jan-30-2020	DSC_2908	21.4286	0	6.12245	35.7143	0	0	0	0	1.02041	0	0	36.7347	0	0	6	0	0	101.02
Mikes.Maze	H	Jan-30-2020	DSC_2917	8.23529	0	23.5294	49.4118	0	0	0	2.35294	0	0	0	17.6471	0	0	0	0	0	101.176
Mikes.Maze	V	Jan-30-2020	DSC_2861	5.59441	0	21.6783	11.8881	0	0	0	11.8881	0	0	0	42.6573	0	0	0	0	6.29371	100
Mikes.Maze	V	Jan-30-2020	DSC_2868	20.8333	0	27.0833	10.4167	0	1.04167	0	8.33333	0	0	0	29.1667	0	0	0	0	3.125	100
Mikes.Maze	V	Jan-30-2020	DSC_2893	14.8438	5.46875	24.2188	7.03125	0	0	0	3.125	0	0	0	45.3125	0	0	0	0	0	100
Mikes.Maze	V	Jan-30-2020	DSC_2887	7.53425	6.84932	26.0274	6.16438	0	1.36986	0	9.58904	0	2.05479	0	40.411	0	0	0	0	0	100
Mikes.Maze	V	Jan-30-2020	DSC_2884	13.1429	0	19.4286	5.14286	0	0.571429	0	13.1429	0	0.571429	0	48	0	0	0	0	0	100
Mikes.Maze	V	Jan-30-2020	DSC_2877	16.2162	1.62162	22.7027	2.7027	0	0	0	8.10811	0	1.08108	0	47.5676	0	0	0	0	0	100
Natural.Reefs	H	Jan-29-2020	DSC_2944	31.7073	4.87805	4.87805	13.0081	0	0	0	0	0.813008	0	21.1382	4.06504	0	0	0	0	0	80.4878
Natural.Reefs	H	Jan-29-2020	DSC_2950	13.7931	2.75862	13.7931	5.51724	0	0	0	0	6.89655	0	40	8.96552	0	2.06897	0	0	0	93.7931
Natural.Reefs	H	Jan-29-2020	DSC_2955	4.13223	1.65289	9.91736	6.61157	0	0	0	0	5.78512	0	61.157	4.13223	0	1.65289	0	0	0	95.0413
Natural.Reefs	H	Jan-29-2020	DSC_2943	8.65777	2.09577	7.83495	8.37486	0	0	0	0	6.46895	0	40.9848	5.7903	0	0	0	0	0	80.2074
Natural.Reefs	H	Jan-29-2020	DSC_2936	18.9385	4.08674	8.93482	10.9854	0	0	0	0	6.45968	0	35.948	4.59375	0	2.48575	0	0	0	92.4326
Natural.Reefs	H	Jan-29-2020	DSC_2985	18.8736	1.95877	4.68947	4.94579	0	0	0	0	0.82735	0	28.3454	2.09476	0	1.42354	0	0	0	63.1588
Natural.Reefs	H	Jan-29-2020	DSC_2960	8.86739	3.96875	13.3298	8.29835	0	0	0	0	1.54986	0	64.4857	11.34584985745743r	0	3.43585	0	0	0	103.936
Natural.Reefs	H	Jan-29-2020	DSC_2931	15.7467	5.98595	12.5949	8.39848	0	0	0	0	6.34324	0	49.9846	9.29374	0	0	0	0	0	108.348
Natural.Reefs	H	Jan-29-2020	DSC_2909	18.8576	1.54545	8.98583	10.3988	0	0	0	0	4.33025	0	26.4585	8.23472	0	1.34536	0	0	0	80.1564
Natural.Reefs	H	Jan-29-2020	DSC_2931	25.8576	1.96886	10.4345	7.23474	0	0	0	0	5.45844	0	39.4596	4.33574	0	0	0	0	0	89.7741
Means
Site	Side	Algal.Matrix	Macroalgae	Coralline.Algae	Biofilm	Anemone	Ascidian	Bivalve	Bryozoan	Hard.Coral	Polychaete	Soft.Coral	Sponge	Other	Total		Invert		Site	Algae	Coralline.Algae	Hard.Coral	Soft.Coral	Sponge	Ascidian	Other
TB.H	H	16.4413	0	2.65487	22.4572	0	2.97872	0	1.32743	0	0	0	12.2369	0	58.0964		16.543		TB.H	16.4413	2.65487	0	0	12.2369	2.97872	23.7846
TB.V	V	14.0966	0	6.34441	25.5989	0	0.714219	0.143678	3.89012	0	1.98048	0	47.2316	0	100		53.9601		TB.V	14.0966	6.34441	0	0	47.2316	0.714219	31.6132
GB.H	H	13.9056	18.5699	0	0	0	0	0	0	0	0	0	0	0	32.4756		0		GB.H	32.4756	0	0	0	0	0	0
GB.V	V	19.9564	10.5454	0	3.84615	0	4.43223	0	0	0	1	0	20.1667	0	59.9468		25.5989		GB.V	30.5018	0	0	0	20.1667	4.43223	4.84615
MM.H	H	13.2213	0	11.8112	35.7738	0	0	0	0	0.510204	0	0	36.1	0	97.4165		36.6102		MM.H	13.2213	11.8112	0.510204	0	36.1	0	35.7738
MM.V	V	13.0275	2.32328	23.5232	7.22433	0	0.49716	0	9.03108	0	0.617884	0	42.1858	0	98.4302		52.332		MM.V	15.3507	23.5232	0	0	42.1858	0.49716	16.8733
MM.N	H	16.5442	3.09652	9.5295	8.37898	0	0	0	0	4.49823	0	40.7651	5.72093	1.24062	89.7741		52.2249		MM.N	19.6407	9.5295	4.49823	40.7651	5.72093	0	9.6196

## Sheet: Fish_Abun
Site	Frame	Acanthurus spp. (Surgeonfish/Doctorfish)	Abudefduf saxatilis (Sergeant major)	Stegastes partitus (bicolor damselfish)	Mycteroperca sp. (grouper)	Thalassoma bifasciatum (bluehead wrasse)	Scarus spp. (parrotfish)	Halichoeres sp. (wrasse - yellowhead?)	Aluterus spp. (scrawled filefish)	Pseudupeneus maculatus (spotted goatfish)	Mulloidichthys martinicus (yellow goatfish)	Chaetodon striatus (banded butterflyfish)	Chaetodon capistratus (foureye butterflyfish)	Haemulon flavolineatum (french grunt)	Blue tang (Acanthurus coeruleus)	Squirrelfish (Holocentrus adscensionis)	Horse-eye jack (Caranx latus)	Baracouda (Sphyraena barracuda)	Gobies (Coryphopterus spp.)	Total_Frequency	Notes
MM	fishies.00_01_00_00.Still002	1	1	0	0	0	0	0	0	0	0	0	0	0	0	0	0	0	0	2
MM	fishies.00_02_00_00.Still003	3	1	1	0	0	0	0	0	0	0	0	0	0	0	0	0	0	0	5
MM	fishies.00_03_00_00.Still004	3	1	0	0	0	0	0	0	0	0	0	0	0	0	0	0	0	0	4
MM	fishies.00_04_00_00.Still005	4	1	0	0	0	0	0	0	0	0	0	0	0	0	0	0	0	0	5
MM	fishies.00_05_00_00.Still006	1	1	0	0	0	0	0	0	0	0	0	0	0	0	0	0	0	0	2
MM	fishies.00_06_00_00.Still007	0	0	2	0	0	0	0	0	0	0	0	0	0	0	0	0	0	0	2
MM	fishies.00_07_00_00.Still008	1	1	1	0	0	0	0	0	0	0	0	0	0	0	0	0	0	0	3
MM	fishies.00_08_00_00.Still009	2	2	0	0	0	0	0	0	0	0	0	0	0	0	0	0	0	0	4
MM	fishies.00_09_00_00.Still010	2	0	0	0	0	0	0	0	0	0	0	0	0	0	0	0	0	0	2
MM	fishies.00_10_00_00.Still011	3	0	0	0	0	0	0	0	1	1	0	0	0	0	0	0	0	0	5
		2	0.8	0.4	0	0	0	0	0	0.1	0.1	0	0	0	0	0	0	0	0	3.4
TB	fishies.00_00_48_27.Still002	0	0	4	0	22	0	0	0	4	0	0	0	0	0	1	0	0	0	31
TB	fishies.00_01_25_28.Still003	0	0	3	0	47	0	0	0	0	0	0	0	0	5	1	0	0	0	56
TB	fishies.00_02_06_06.Still004	1	0	3	0	34	0	0	0	2	0	0	0	0	1	1	0	0	0	42
TB	fishies.00_02_45_10.Still005	1	0	4	0	46	0	0	0	1	4	0	0	0	0	1	0	0	0	57
TB	fishies.00_03_25_02.Still006	0	0	3	0	39	0	0	0	3	4	0	0	0	0	1	0	0	0	50
TB	fishies.00_04_04_08.Still007	0	0	4	0	40	0	0	0	8	2	0	0	0	0	1	0	0	0	55
TB	fishies.00_04_42_09.Still008	0	0	5	0	33	0	0	0	4	3	0	0	0	1	1	0	0	0	47
TB	fishies.00_05_25_09.Still009	0	0	3	0	31	0	0	0	0	2	0	0	0	1	1	0	0	0	38
TB	fishies.00_06_05_01.Still010	0	0	3	0	41	0	0	0	1	4	0	0	0	1	1	0	0	0	51
TB	fishies.00_06_45_24.Still011	0	0	3	0	22	0	0	0	0	1	0	0	0	1	0	0	1	0	28
		0.2	0	3.5	0	35.5	0	0	0	2.3	2	0	0	0	1	0.9	0	0.1	0	45.5
Site	Mean	SD
MM	3.4	1.3499
TB	45.5	10.3843

## Sheet: Fish_Species
Site	Species	Video	Code
MM	Acanthurus spp. (Surgeonfish/Doctorfish)	GH030175	0
MM	Abudefduf saxatilis (Sergeant major)	GH030175	1
MM	Stegastes partitus (bicolor damselfish)	GH030175	2
MM	Mycteroperca sp. (grouper)	GH030175	3
MM	Thalassoma bifasciatum (bluehead wrasse)	GH030175	4
MM	Scarus spp. (parrotfish)	GH030175	5
MM	Halichoeres sp. (wrasse - yellowhead?)	GH030175	6
MM	Aluterus spp. (scrawled filefish)	GH030175	7
MM	Pseudupeneus maculatus (spotted goatfish)	GH030175	8
MM	Mulloidichthys martinicus (yellow goatfish)	GH030175	9
MM	Chaetodon striatus (banded butterflyfish)	GH030175	10
MM	Chaetodon capistratus (foureye butterflyfish)	GH030175	11
MM	Haemulon flavolineatum (french grunt)	GH030175	12
TB	Bluehead wrasse (Thalassoma bifasciatum)	GX020622
TB	Blue tang (Acanthurus coeruleus)	GX020622	13
TB	Bicolor damselfish (Stegastes partitus)	GX020622
TB	Surgeonfish/Doctorfish (Acanthurus spp.)	GX020622
TB	Squirrelfish (Holocentrus adscensionis)	GX020622	14
TB	Spotted goatfish (Pseudupeneus maculatus)	GX020622
TB	Horse-eye jack (Caranx latus)	GX020622	15
TB	Yellow goatfish (Mulloidichthys martinicus)	GX020622	16
TB	Baracouda (Sphyraena barracuda)	GX020622	17
GB	Gobies (Coryphopterus spp.)	NA

## Sheet: Bites
Fish species	Bite Rates (bites/min)	Behaviour
Mike’s Maze (MM)
Acanthurus spp.	2.11	Grazing
Abudefduf saxatilis	0.77	Grazing, sheltering
Stegastes partitus	0.64	Grazing, sheltering
Mycteroperca sp.	0.13	Grazing
Thalassoma bifasciatum	0.06	Grazing
Scarus spp.	0.06	Grazing
Halichoeres sp.	0.06	Grazing
Aluterus spp.	0.06	Grazing
Pseudupeneus maculatus		Present near structure
Mulloidichthys martinicus		Present near structure
Chaetodon striatus		Present near structure
Chaetodon capistratus		Present near structure
Haemulon flavolineatum		Present near structure
Total	3.89
The Bridge (TB)
Bluehead wrasse (Thalassoma bifasciatum)	1.15	Sheltering, grazing
Blue tang (Acanthurus coeruleus)	0.46	Grazing
Bicolor damselfish (Stegastes partitus)	0.46	Sheltering, grazing
Surgeonfish/Doctorfish (Acanthurus spp.)	0.35	Grazing
Squirrelfish (Holocentrus adscensionis)	0.12	Sheltering
Spotted goatfish (Pseudupeneus maculatus)	0.12	Foraging, grazing
Horse-eye jack (Caranx latus)		Present near structure
Yellow goatfish (Mulloidichthys martinicus)		Foraging, sheltering
Baracouda (Sphyraena barracuda)		Present near structure
Total	2.66
Great Bay (GB)
Coryphopterus spp.		Sheltering
